# Supplementary material for: Faster and cleaner dynamic kinetic resolution via mechanochemistry
Source: Royal Society of Chemistry journal article supplement (doi:10.1039/c4gc01416b), 2014-10-15
Supplement: c4gc01416b1.pdf [file c4gc01416b1.pdf]

## Supporting Information for

### Faster and cleaner dynamic kinetic resolution *via* mechanochemistry

Thomas-Xavier Métro,\* Xavier J. Salom-Roig, Maëva Reverte, Jean Martinez and Frédéric Lamaty\*

Institut des Biomolécules Max Mousseron (IBMM), UMR 5247 CNRS-Universités Montpellier 1 et 2-  
ENSCM, Bâtiment 17, Université Montpellier 2, Place Eugène Bataillon  
34095 Montpellier cedex 5, France.

E-mail : txmetro@univ-montp2.fr; frederic.lamaty@univ-montp2.fr

### Table of contents

General

General procedures for Experiments & Analytical Data

<sup>1</sup>H and <sup>13</sup>C spectra

EcoScale Calculations

References

#### **General:**

All reagents were purchased from Sigma-Aldrich and used without further purification. The milling treatments were carried out in a Retsch Mixer Mill 200 at 30 Hz in a 10 mL stainless steel reactor with one 10 mm diameter ball.  $\eta$  ratio is defined as the ratio of the added water volume to the sum of the mass of reactants and is expressed in  $\mu\text{L mg}^{-1}$ . <sup>1</sup>H NMR spectra were recorded on a Bruker Avance DPX 300 MHz spectrometer and are reported in ppm using solvent as an internal standard (CDCl<sub>3</sub> at 7.26 ppm). Data are reported as s = singlet, d = doublet, t = triplet, m = multiplet; coupling constant in Hz; integration. <sup>13</sup>C NMR spectra were recorded on a Bruker Avance AM 75 MHz spectrometer and are reported in ppm using solvent as an internal standard (CDCl<sub>3</sub> at 77.16 ppm). Mass spectra were obtained by LC-MS with ESI using a Water Alliance 2695 as LC, coupled to a Waters ZQ spectrometer with electrospray source, a simple quadrupole analyzer and a UV Waters 2489 detector. Diastereomeric excess was measured using 300 MHz <sup>1</sup>H NMR spectra.

## General procedures:

### 2-(*S*)-(Dibenzylamino)-phenylacetic acid (*R*)-pantolactone ester **2a**:<sup>2</sup>

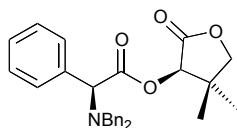

#### Reactions in solvent with magnetic stirring:

Reaction in THF with Et<sub>3</sub>N as base (Table 1, entry 1 in the manuscript):<sup>2</sup>

(*R,S*)-2-Bromo-2-phenylacetic acid (*R*)-pantolactone ester (**1**)<sup>2</sup> (100.0 mg, 0.306 mmol, 1.0 eq), Et<sub>3</sub>N (85  $\mu$ L, 0.611 mmol, 2.0 eq) and TBAI (22.6 mg, 0.061 mmol, 0.2 eq) were introduced in a round-bottom flask equipped with a magnetic stirrer and dissolved in anhydrous THF (1.53 mL). After 15 min of vigorous stirring, dibenzylamine (71  $\mu$ L, 0.367 mmol, 1.2 eq) was added to the reaction mixture and the latter was stirred until complete conversion of the starting material (5 h). The reaction medium was diluted with deionised water and the aqueous phase was extracted with EtOAc. The combined organic extracts were washed with 10% aqueous KHSO<sub>4</sub> solution and with deionised water. The organic phase was dried over MgSO<sub>4</sub>, filtered, concentrated and purified on silica gel (cyclohexane/EtOAc) to afford 80.0 mg of the desired product **2a** as an oil (59% yield) with a diastereomeric ratio superior to 98:2 as determined by 300 MHz <sup>1</sup>H NMR spectrum of the crude.

Reaction in water and NaHCO<sub>3</sub> as base (Table 1, entry 2 in the manuscript):

(*R,S*)-2-Bromo-2-phenylacetic acid (*R*)-pantolactone ester (**1**)<sup>2</sup> (25.0 mg, 0.076 mmol, 1.0 eq), NaHCO<sub>3</sub> (7.5 mg, 0.089 mmol, 1.2 eq) and TBAI (5.5 mg, 0.015 mmol, 0.2 eq) were introduced in a test tube equipped with a magnetic stirrer and dissolved in a minimum of water (0.5 mL) allowing for efficient stirring of the reaction mixture. After 15 min of vigorous stirring, dibenzylamine (17.5  $\mu$ L, 0.091 mmol, 1.2 eq) was added and the reaction mixture was stirred during 6 h. EtOAc was added to the reaction media, the organic phase was washed with an aqueous 10% KHSO<sub>4</sub> solution, water, dried over MgSO<sub>4</sub>, filtered, concentrated and purified on column chromatography on silica gel (cyclohexane/EtOAc) to afford 19.6 mg of a 50:50 mol:mol mixture of the desired product **2a** and the starting material **1** (34% yield, 50% brsm). The diastereomeric ratio of **2a** could be determined as 87:13 by 300 MHz <sup>1</sup>H NMR spectrum of the crude.

Reactions in EtOAc, DMF and NaHCO<sub>3</sub> as base (Table 1, entries 3 and 6 in the manuscript):

(*R,S*)-2-Bromo-2-phenylacetic acid (*R*)-pantolactone ester (**1**)<sup>2</sup> (50.0 mg, 0.153 mmol, 1.0 eq), NaHCO<sub>3</sub> (15.4 mg, 0.183 mmol, 1.2 eq) and TBAI (11.3 mg, 0.031 mmol, 0.2 eq) were introduced in a test tube equipped with a magnetic stirrer and dissolved in a minimum of solvent (1.0 mL) allowing for efficient stirring of the reaction mixture. After 15 min of vigorous stirring, dibenzylamine (35  $\mu$ L, 0.183 mmol, 1.2 eq) was added to the reaction mixture which was stirred until complete conversion of the substrate. Deionised water was added to the reaction media, and phases were separated. Aqueous phase was extracted with EtOAc and the combined organic phases were washed with an aqueous 10% KHSO<sub>4</sub> solution, water, dried over MgSO<sub>4</sub>, filtered, concentrated and purified on column chromatography on silica gel

(cyclohexane/EtOAc) to afford the desired product **2a** as a yellow oil with the following yields and diastereomeric ratios: EtOAc : 73%, dr > 98:2; DMF : 55%, dr > 98:2.

Reaction in the ball-mill (Table 1, entries 7, 8 and 9 in the manuscript):

(*R,S*)-2-Bromo-2-phenylacetic acid (*R*)-pantolactone ester (**1**)<sup>2</sup> (84.2 mg, 0.257 mmol, 1.0 eq), NaHCO<sub>3</sub> (25.9 mg, 0.309 mmol, 1.2 eq), TBAI (19.0 mg, 0.051 mmol, 0.2 eq) and the corresponding amount of water (no water for  $\eta$  ratio = 0  $\mu\text{L mg}^{-1}$ ; 190  $\mu\text{L}$  for  $\eta$  ratio = 1  $\mu\text{L mg}^{-1}$  and 380  $\mu\text{L}$  for  $\eta$  ratio = 2  $\mu\text{L mg}^{-1}$ )<sup>1</sup> were placed in a 10 mL jar with one 10 mm diameter ball. After 15 minutes of mechanical stirring at 30 Hz, dibenzylamine (59.3  $\mu\text{L}$ , 0.309 mmol, 1.2 eq) was added and the reaction medium was stirred in the ball-mill during 1 hour at 30 Hz. Conversion of the substrate was determined by HPLC analysis of the reaction mixture during the course of the reaction. The reaction medium was recovered with EtOAc and the organic phase was washed with an aqueous 10% KHSO<sub>4</sub> solution, water, dried over MgSO<sub>4</sub>, filtered, concentrated and purified by column chromatography on silica gel (cyclohexane/EtOAc) to afford the desired product **2a** as a colorless oil with the following yields and diastereomeric ratios:

- $\eta = 0$ , 62% yield, dr>98:2
- $\eta = 1$ , 94% yield, dr>98:2
- $\eta = 2$ , 96% yield, dr>98:2.

<sup>1</sup>H NMR (300 MHz, CDCl<sub>3</sub>):  $\delta = 7.48\text{-}7.18$  (m, 15H), 5.58 (s, 1H), 4.76 (s, 1H), 4.06 (s, 2H), 3.82 (ABq, 4H, *J* 13.9 Hz), 1.20 (s, 3H), 0.97 (s, 3H). <sup>13</sup>C NMR (75 MHz, CDCl<sub>3</sub>):  $\delta = 172.9, 171.4, 139.7, 136.9, 129.4, 129.1, 128.9, 128.7, 128.5, 127.5, 76.3, 75.1, 65.6, 54.1, 39.9, 22.9, 19.8$ . MS (ESI): *m/z* 444.2 [M+H]<sup>+</sup>

### 2-(*S*)-[(*S*)- $\alpha$ -methylbenzylamine]-phenylacetic acid (*R*)-pantolactone ester **3**:<sup>2</sup>

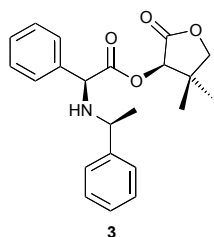

(*R,S*)-2-Bromo-2-phenylacetic acid (*R*)-pantolactone ester (**1**)<sup>2</sup> (96.0 mg, 0.294 mmol, 1.0 eq), NaHCO<sub>3</sub> (29.6 mg, 0.352 mmol, 1.2 eq), TBAI (21.7 mg, 0.059 mmol, 0.2 eq) and water (380  $\mu\text{L}$  for  $\eta$  ratio = 2  $\mu\text{L mg}^{-1}$ )<sup>1</sup> were placed in a 10 mL jar with one 10 mm diameter ball. After 15 minutes of mechanical stirring at 30 Hz, (*S*)-(-)- $\alpha$ -methylbenzylamine (45.4  $\mu\text{L}$ , 0.352 mmol, 1.2 eq) was added and the reaction medium was stirred in the ball-mill during 30 min at 30 Hz. The reaction medium was recovered with EtOAc and the organic phase was washed with water, dried over MgSO<sub>4</sub>, filtered, concentrated and purified by column chromatography on silica gel (cyclohexane/EtOAc) to afford the desired product **3** as a yellow oil (86 mg, 80% yield).

<sup>1</sup>H NMR (300 MHz, CDCl<sub>3</sub>):  $\delta = 7.35\text{-}7.17$  (m, 10H), 5.36 (s, 1H), 4.32 (s, 1H), 3.91 (s, 2H), 3.87 (q, 1H, *J* 6.5 Hz), 2.30 (s large, 1H), 1.36 (d, 3H, *J* 6.5 Hz), 0.95 (s, 3H), 0.68 (s, 3H). <sup>13</sup>C NMR (75 MHz, CDCl<sub>3</sub>):  $\delta = 173.2, 172.0, 144.6, 138.3, 128.9, 128.7, 128.3, 127.4, 127.2, 76.2, 75.4, 63.0, 56.6, 40.4, 24.6, 22.9, 19.5$ . MS (ESI): *m/z* 367.9 [M+H]<sup>+</sup>

## 2-(*S*)-(4-Methoxyphenylamino)phenylacetic acid (*R*)-pantolactone ester **4**:<sup>2</sup>

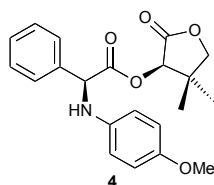

(*R,S*)-2-Bromo-2-phenylacetic acid (*R*)-pantolactone ester (**1**)<sup>2</sup> (50.4 mg, 0.154 mmol, 1.0 eq), NaHCO<sub>3</sub> (15.5 mg, 0.185 mmol, 1.2 eq), TBAI (11.4 mg, 0.031 mmol, 0.2 eq), water (300  $\mu$ L,  $\eta$  ratio = 3  $\mu$ L mg<sup>-1</sup>) were placed in a 10 mL jar with one 10 mm diameter ball. After 15 minutes of mechanical stirring at 30 Hz, *p*-anisidine (22.8 mg, 0.185 mmol, 1.2 eq) was added and the reaction medium was stirred in the ball-mill during 6 h at 30 Hz. The reaction medium was recovered with EtOAc and the organic phase was washed with an aqueous 10% KHSO<sub>4</sub> solution, dried over MgSO<sub>4</sub>, filtered, concentrated and purified by column chromatography on silica gel (cyclohexane/EtOAc) to afford 36.3 mg of the desired product **4** as a yellow oil (64% yield) with a diastereomeric ratio of 88:12 determined by 300 MHz <sup>1</sup>H NMR spectrum of the crude.

<sup>1</sup>H NMR (300 MHz, CDCl<sub>3</sub>):  $\delta$  = 7.54 (d, 2H, *J* 6.5 Hz), 7.40-7.32 (m, 3H), 6.73 (d, 2H, *J* 8.9 Hz), 6.64 (d, minor dia, *J* 9.2 Hz), 6.57 (d, 2H, *J* 8.9 Hz), 5.37 (s, 1H), 5.31 (s, minor dia), 5.19 (s, 1H), 4.61 (s large, 1H), 3.94 (s, 2H), 3.74 (s, minor dia), 3.71 (s, 3H), 1.14 (s, 0.12H, minor dia), 1.05 (s, 0.12H, minor dia), 0.91 (s, 3H), 0.67 (s, 3H). <sup>13</sup>C NMR (75 MHz, CDCl<sub>3</sub>):  $\delta$  = 171.9, 171.6, 173.4 (min dia), 152.8, 140.1, 137.8, 136.7 (min dia), 129.1, 129.0 (min dia), 128.8, 128.7 (min dia), 127.6, 127.3 (min dia), 115.4 (min dia), 115.0, 114.9 (min dia), 114.8, 76.3, 76.2 (min dia), 75.9, 61.9 (min dia), 61.8, 55.8, 40.5, 40.4 (min dia), 23.1 (min dia), 22.7, 19.9 (min dia), 19.3. MS (ESI): *m/z* 370.2 [M+H]<sup>+</sup>

## 2-(*S*)-(4-Methoxyphenoxy)phenylacetic acid (*R*)-pantolactone ester **5**:<sup>3</sup>

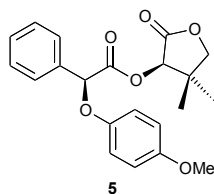

(*R,S*)-2-Bromo-2-phenylacetic acid (*R*)-pantolactone ester (**1**)<sup>2</sup> (50.3 mg, 0.154 mmol, 1.0 eq), NaHCO<sub>3</sub> (15.5 mg, 0.184 mmol, 1.2 eq), TBAI (11.4 mg, 0.031 mmol, 0.2 eq) and water (200  $\mu$ L,  $\eta$  ratio = 2  $\mu$ L mg<sup>-1</sup>) were placed in a 10 mL jar with one 10 mm diameter ball. After 15 minutes of mechanical stirring at 30 Hz, 4-methoxyphenol (22.9 mg, 0.184 mmol, 1.2 eq) was added and the reaction medium was stirred in the ball-mill during 2 h at 30 Hz. The reaction medium was recovered with EtOAc and the organic phase was washed with an aqueous 0.1 N NaOH solution, water, dried over MgSO<sub>4</sub>, filtered, concentrated and purified by column chromatography on silica gel (cyclohexane/EtOAc) to afford 49.0 mg of the desired product **5** as a yellow oil (86% yield and 72:28 dr determined by 300 MHz <sup>1</sup>H NMR spectrum of the crude).

<sup>1</sup>H NMR (300 MHz, CDCl<sub>3</sub>):  $\delta$  = 7.62-7.59 (m, 2H), 7.39-7.26 (m, 3H), 6.93 (d, 2H, *J* 9.1 Hz), 6.81 (d, 2H, *J* 9.1 Hz), 5.70 and 5.69 (s, 1H, **5** and minor dia), 5.39 and 5.30 (s, 1H, **5** and minor dia), 3.95 (s, 2H), 1.13 (. <sup>13</sup>C NMR (75 MHz, CDCl<sub>3</sub>, 2 diastereoisomers):  $\delta$  = 172.0, 171.5 (min dia), 169.5, 155.2 (min dia), 155.0, 151.5 (min dia), 151.4, 135.6, 135.3 (min dia), 129.6, 129.4 (min dia), 129.2, 129.0 (min dia), 127.7, 127.2 (min dia), 117.7 (min dia), 116.9, 115.0, 114.9 (min dia), 80.1 (min dia), 79.2, 76.3 (min dia), 76.3, 76.1

(min dia), 75.7, 55.9, 40.7, 40.6 (min dia), 23.3 (min dia), 22.9, 20.0 (min dia), 19.5. MS (ESI):  $m/z$  388.2  $[M+NH_4]^+$

## 2-(2,6-dichlorophenoxy)phenylacetic acid (*R*)-pantolactone ester **6**:<sup>4</sup>

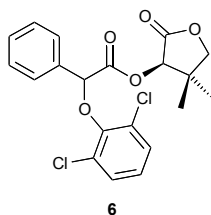

(*R,S*)-2-Bromo-2-phenylacetic acid (*R*)-pantolactone ester (**1**)<sup>2</sup> (89.1 mg, 0.272 mmol, 1.0 eq),  $NaHCO_3$  (27.5 mg, 0.327 mmol, 1.2 eq), TBAI (20.1 mg, 0.054 mmol, 0.2 eq) and water (380  $\mu$ L for  $\eta$  ratio = 2  $\mu$ L  $mg^{-1}$ )<sup>1</sup> were placed in a 10 mL jar with one 10 mm diameter ball. After 15 minutes of mechanical stirring at 30 Hz, 2,6-dichlorophenol (53.3 mg, 0.327 mmol, 1.2 eq) was added and the reaction medium was stirred in the ball-mill during 1 h 30 at 30 Hz. The reaction medium was recovered with EtOAc and the organic phase was washed twice with aqueous saturated  $NaHCO_3$  solution, dried over  $MgSO_4$ , filtered, concentrated and purified by column chromatography on silica gel (cyclohexane/EtOAc) to afford the desired product **6** as a colorless oil (86 mg, 77% yield).

<sup>1</sup>H NMR (300 MHz,  $CDCl_3$ , 2 diastereoisomers):  $\delta$  = 7.68-7.58 (m, 2H), 7.42-7.39 (m, 3H), 7.30 (d, 1.12H,  $J$  2.4 Hz), 7.28 (d, 0.88H,  $J$  2.0 Hz), 7.04-6.96 (m, 1H), 6.00 (s, 0.56H), 5.98 (s, 0.44H), 5.48 (s, 0.56H), 5.39 (s, 0.44H), 4.07-3.99 (m, 2H), 1.19 (s, 1.32H), 1.06 (s, 1.32H), 1.06 (s, 1.68H), 0.75 (s, 1.68H). <sup>13</sup>C NMR (75 MHz,  $CDCl_3$ , 2 diastereoisomers):  $\delta$  = 171.8, 171.2, 168.5, 168.4, 150.0, 149.9, 134.9, 134.4, 129.8, 129.6, 129.4, 129.3, 129.2, 128.7, 128.6, 128.5, 128.1, 125.6, 125.5, 82.7, 82.4, 76.2, 76.1, 75.9, 75.6, 40.6, 40.4, 23.1, 23.0, 19.8, 19.4. MS (ESI):  $m/z$  426.1  $[M+NH_4]^+$

## *N,N*-Dibenzyl-*D*-alanyl-*L*-proline methyl ester **8**:<sup>5,6</sup>

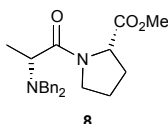

1-(2-Bromo-1-oxopropyl)-*L*-proline methyl ester (**7**)<sup>7</sup> (39.1 mg, 0.148 mmol, 1.0 eq),  $NaHCO_3$  (14.9 mg, 0.178 mmol, 1.2 eq), TBAI (10.9 mg, 0.030 mmol, 0.2 eq) and water (200  $\mu$ L,  $\eta$  ratio = 2  $\mu$ L  $mg^{-1}$ ) were placed in a 10 mL jar with one 10 mm diameter ball. After 15 minutes of mechanical stirring, dibenzylamine (34.2  $\mu$ L, 0.178 mmol, 1.2 eq) was added and the reaction medium was stirred in a ball-mill during 12 hours at 30 Hz. Dibenzylamine was added (27.3  $\mu$ L, 0.142 mmol, 0.96 eq) and the reaction medium was stirred during 1 hour to reach complete conversion of the substrate. The reaction medium was recovered with EtOAc and the organic phase was washed with an aqueous 10%  $KHSO_4$  solution, dried over  $MgSO_4$ , filtered, concentrated and purified by column chromatography on silica gel (cyclohexane/EtOAc) to afford 42.3 mg of product **8** as a yellow oil (75% yield) with a dr > 98:2 determined by 300 MHz <sup>1</sup>H NMR spectrum of the crude.

<sup>1</sup>H NMR (300 MHz,  $CDCl_3$ , *trans* conformer):  $\delta$  = 7.39-7.23 (m, 10H), 4.46-4.42 (m, 1H), 3.78 (d, 2H,  $J$  13.4 Hz), 3.78-3.70 (m, 1H), 3.62 (s, 3H), 3.58 (d, 2H,  $J$  13.4 Hz), 3.45-3.38 (m, 1H), 2.90-2.82 (m, 1H), 2.16-1.72 (m, 4H), 1.28 (d, 3H,  $J$  6.8 Hz). <sup>13</sup>C NMR (75 MHz,  $CDCl_3$ , *trans* conformer):  $\delta$  = 173.0, 172.7, 140.0, 129.5, 128.3, 127.1, 59.2, 54.8, 54.2, 52.2, 46.8, 29.2, 25.2, 10.1. MS (ESI):  $m/z$  381.3  $[M+H]^+$

**(S)-4-Cyclohexyl-3-(dibenzylamino)-1-[(R)-p-tolylsulfinyl]butan-2-one 10:**<sup>8</sup>

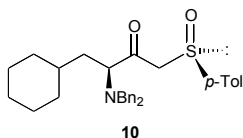

3-Bromo-4-cyclohexyl-1-[(R)-p-tolylsulfinyl]butan-2-one (**9**)<sup>8</sup> (75.2 mg, 0.203 mmol, 1.0 eq), TBAI (15.0 mg, 0.041 mmol, 0.2 eq) and water (380  $\mu\text{L}$ ,  $\eta$  ratio = 2  $\mu\text{L mg}^{-1}$ ) were placed in a 10 mL jar with one 10 mm diameter ball. After 15 minutes of mechanical agitation, dibenzylamine (98  $\mu\text{L}$ , 0.506 mmol, 2.5 eq) was added and the reaction medium was stirred in a ball-mill during 7 hours at 30 Hz. The reaction medium was recovered with EtOAc and the organic phase was washed with an aqueous 10%  $\text{KHSO}_4$  solution, dried over  $\text{MgSO}_4$ , filtered, concentrated and purified by column chromatography on silica gel (cyclohexane/EtOAc) to afford 70.4 mg of the desired product **10** as a yellow oil (71% yield) and a diastereomeric ratio superior to 98:2 as determined by 300 MHz  $^1\text{H}$  NMR spectrum of the crude.

$^1\text{H}$  NMR (300 MHz,  $\text{CDCl}_3$ ):  $\delta$  = 7.40-7.25 (m, 12H), 7.11 (d, 2H,  $J$  8.0 Hz), 4.21 (d, 1H,  $J$  13.2 Hz), 4.09 (d, 1H,  $J$  13.2 Hz), 3.60 (d, 2H,  $J$  13.1 Hz), 3.32 (d, 2H,  $J$  13.4 Hz), 2.75-2.72 (m, 1H), 2.33 (s, 3H), 1.65-0.54 (m, 13H).  $^{13}\text{C}$  NMR (75 MHz,  $\text{CDCl}_3$ ):  $\delta$  = 202.9, 142.7, 140.4, 139.3, 130.4, 129.7, 129.0, 128.0, 125.3, 66.5, 65.3, 54.8, 34.4, 34.1, 32.4, 28.7, 26.8, 26.2, 26.0, 21.2. MS (ESI):  $m/z$  488.3  $[\text{M}+\text{H}]^+$

# $^1\text{H}$ and $^{13}\text{C}$ spectra:

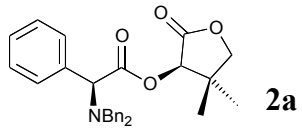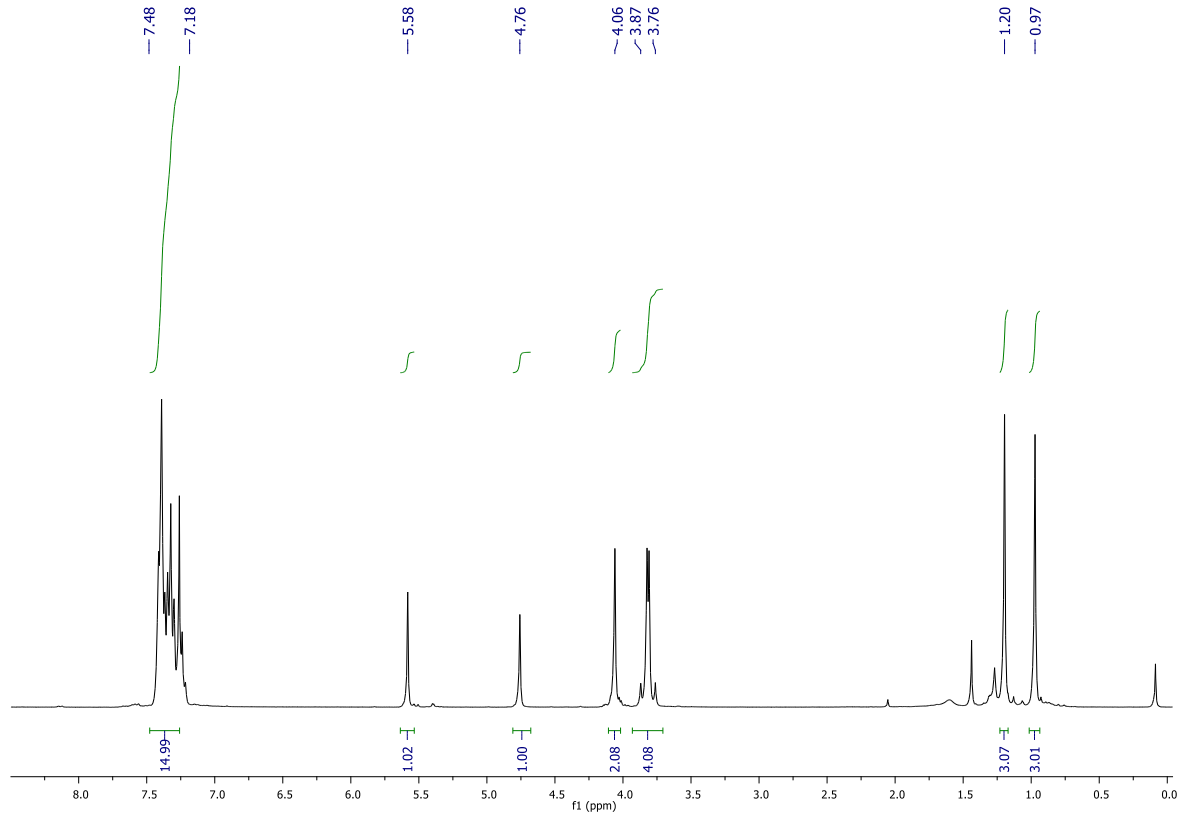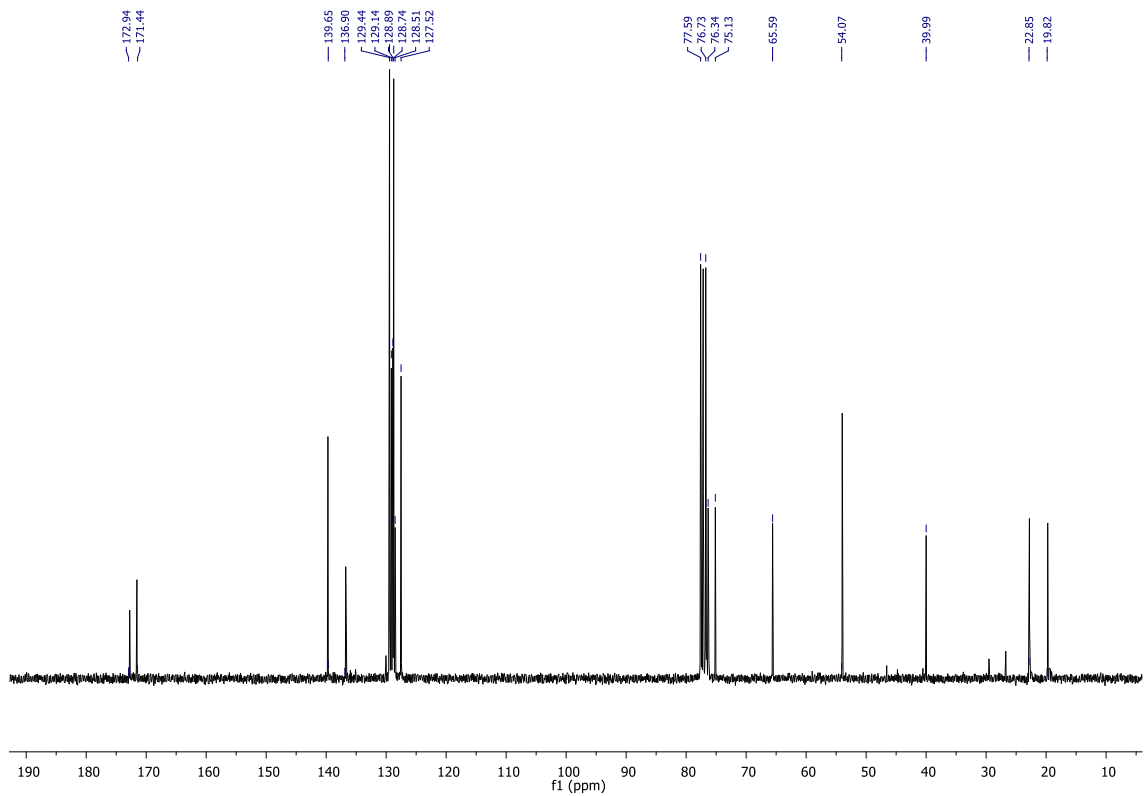

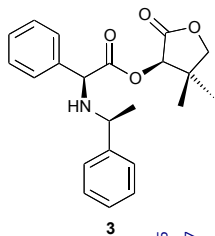

— 7.35  
— 7.17

— 5.36

— 4.32

3.91  
3.88  
3.86  
3.83

— 2.30

1.37  
1.35

— 0.95

— 0.68

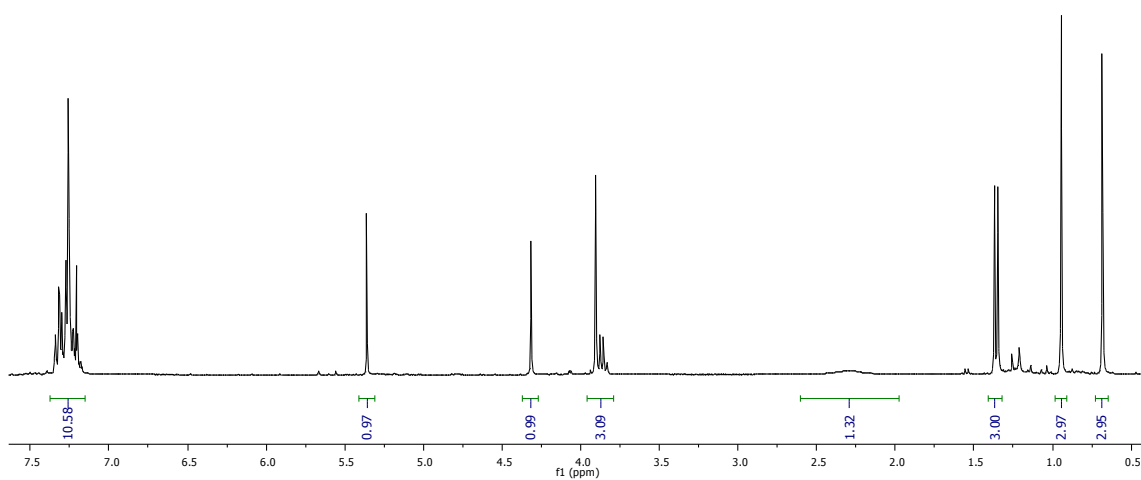

173.18  
172.04

— 144.60

— 138.33

128.91  
128.66  
128.34  
127.36  
127.16

76.22  
75.43

— 62.98

— 56.62

— 40.39

24.62  
22.94  
19.52

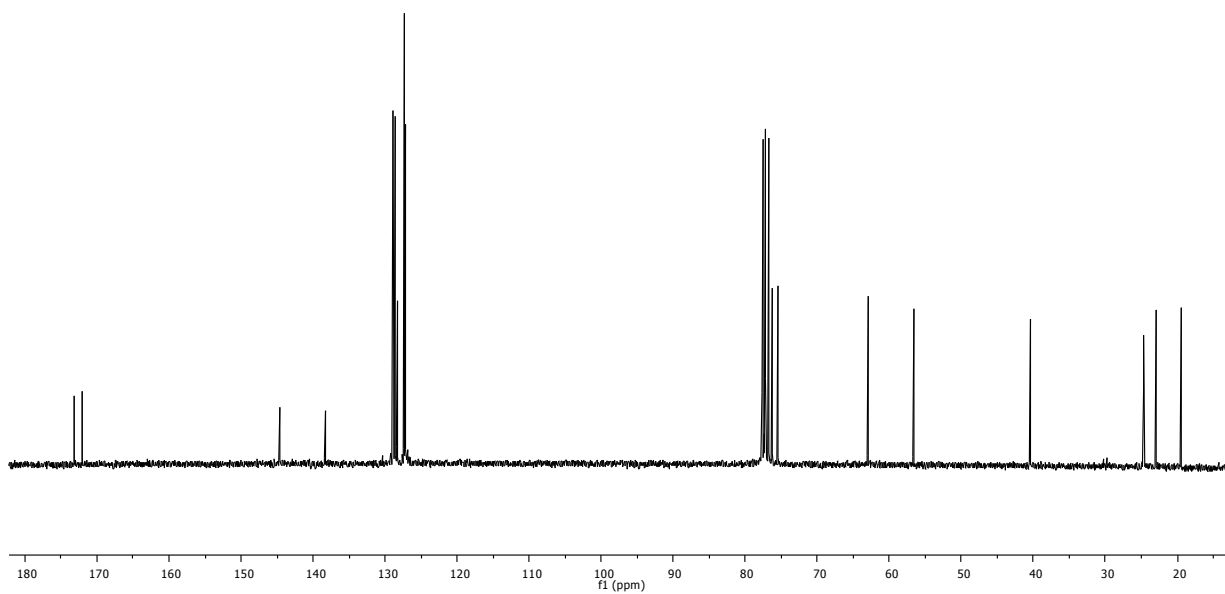



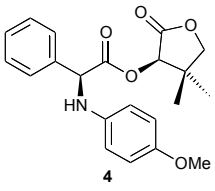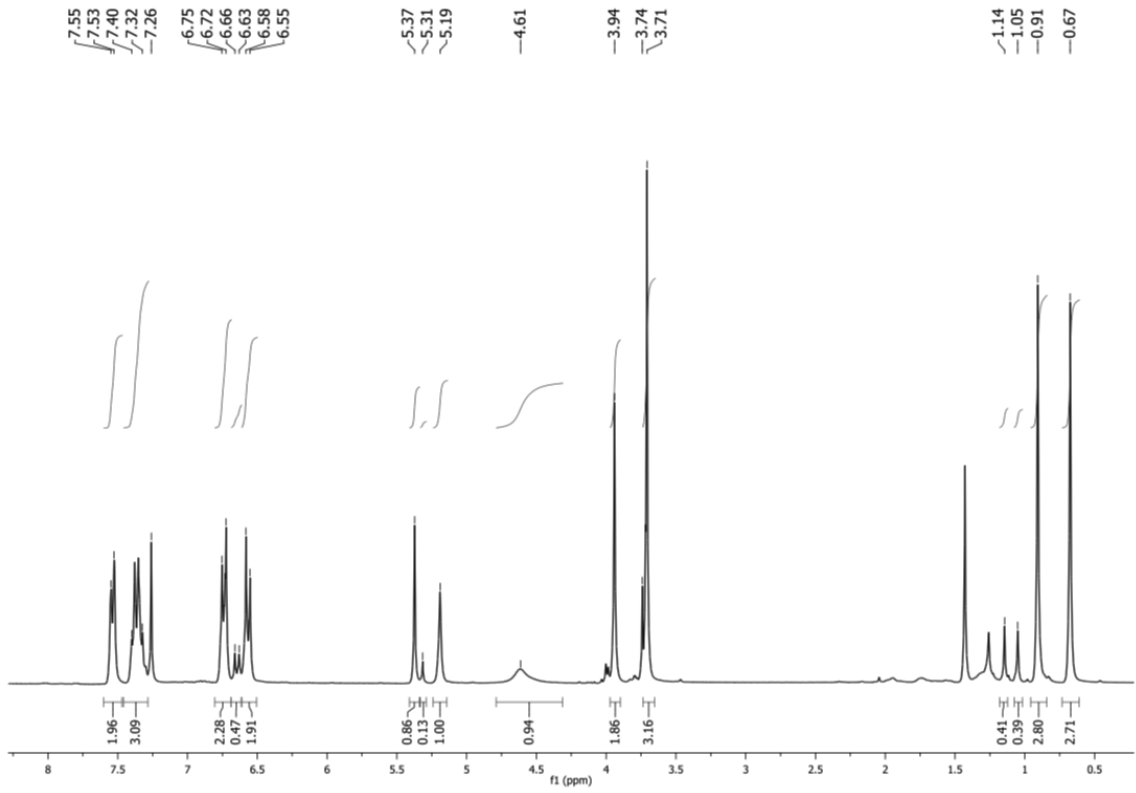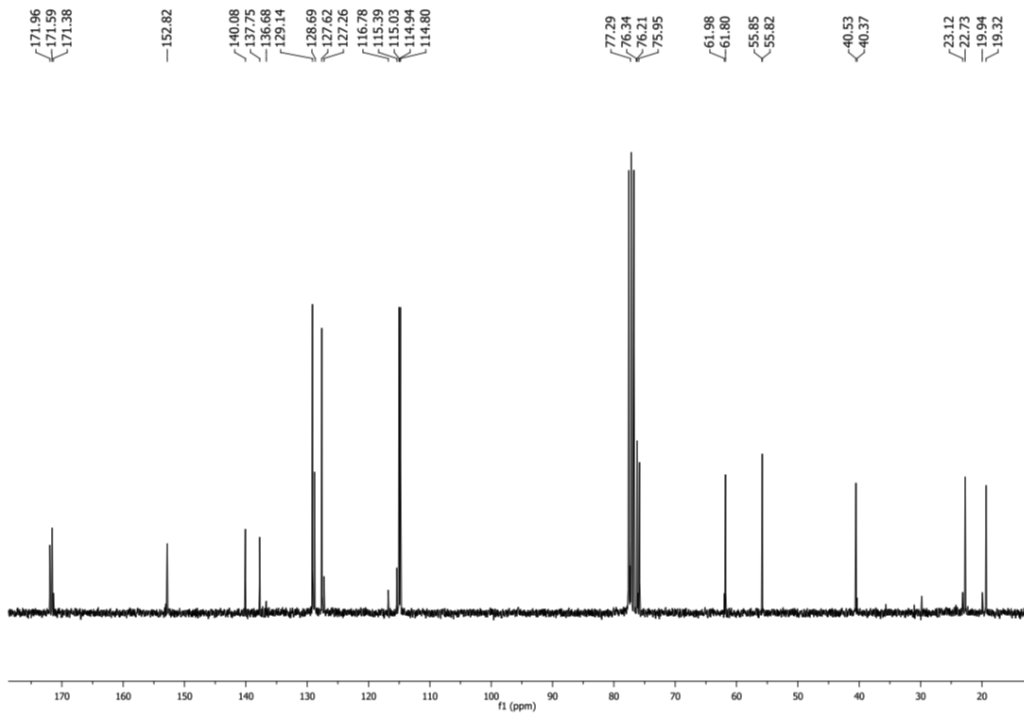

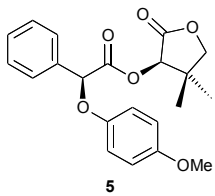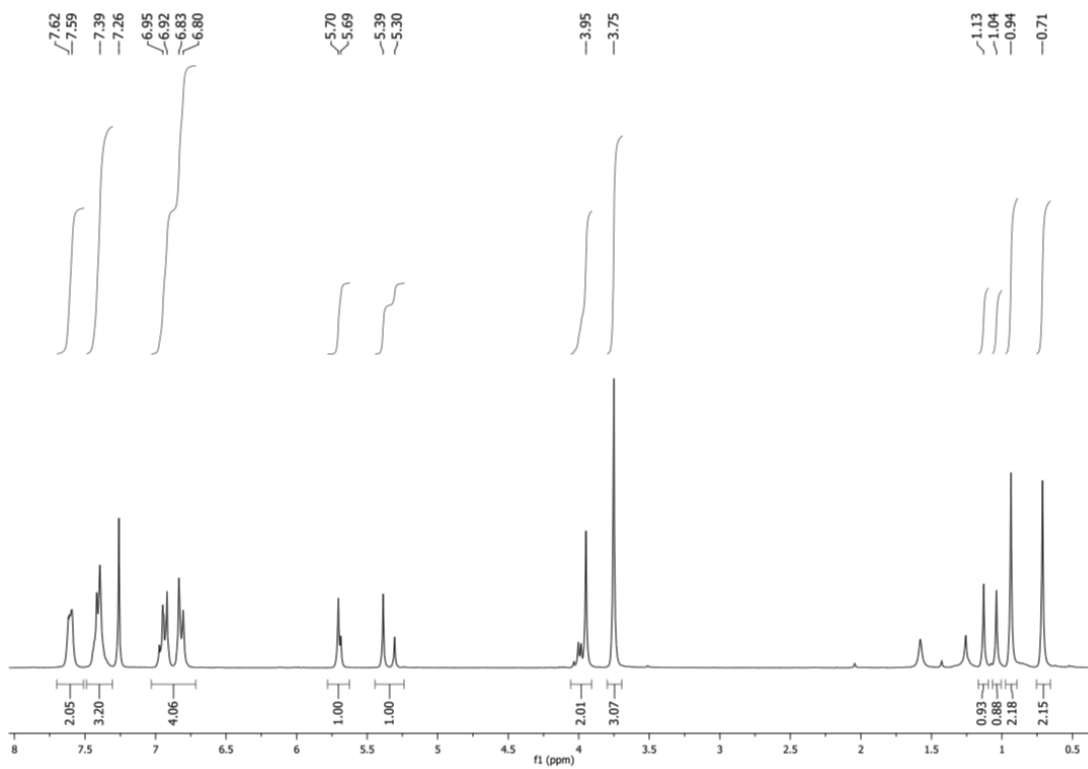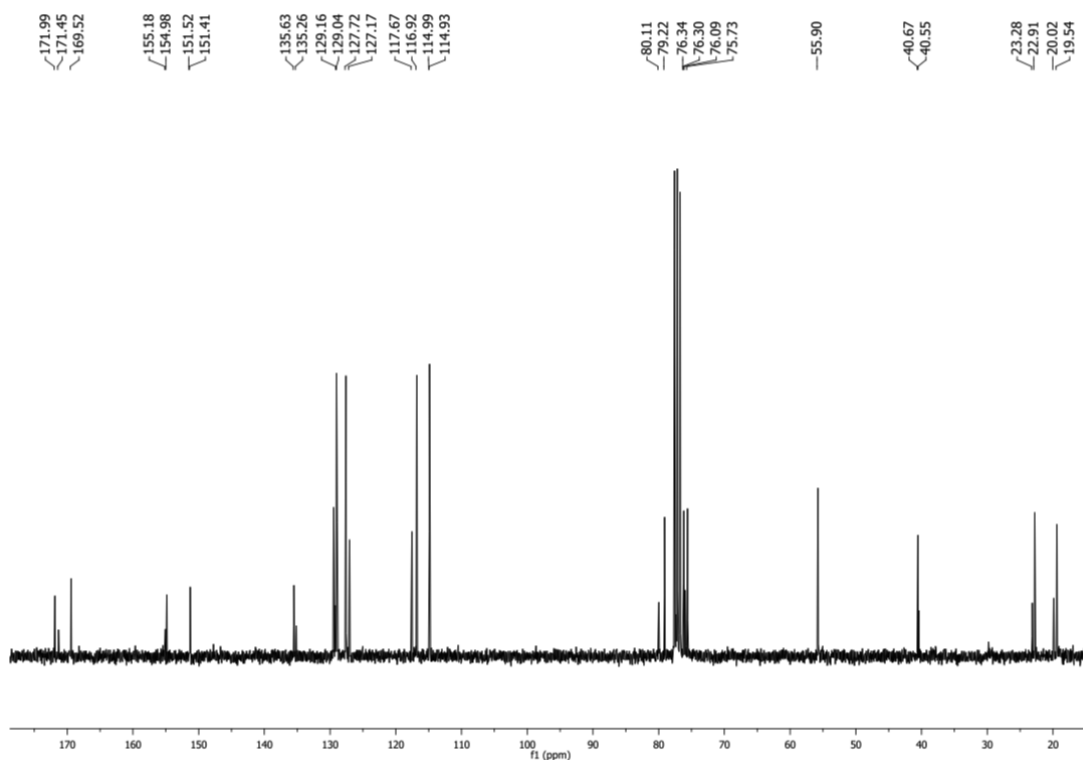

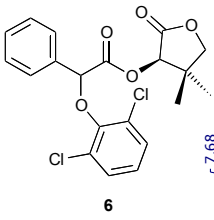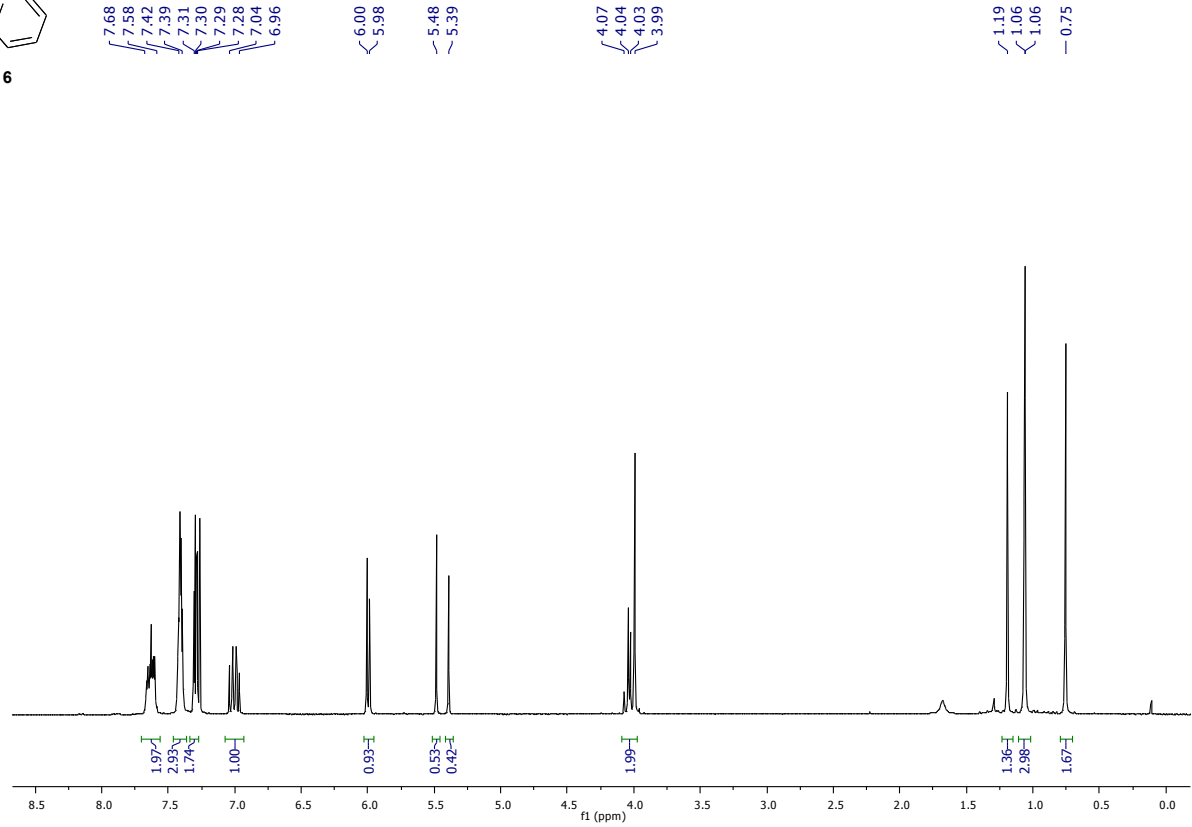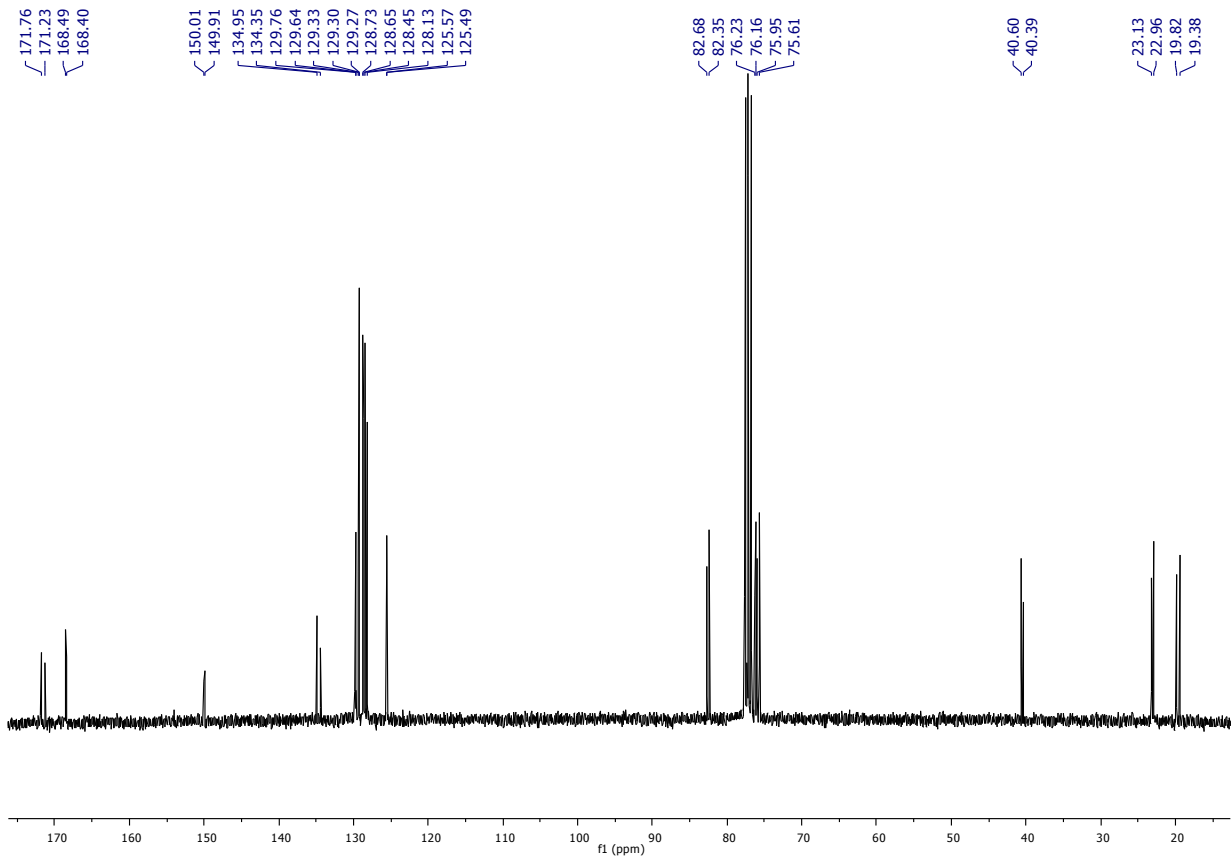

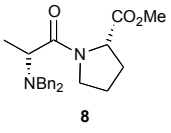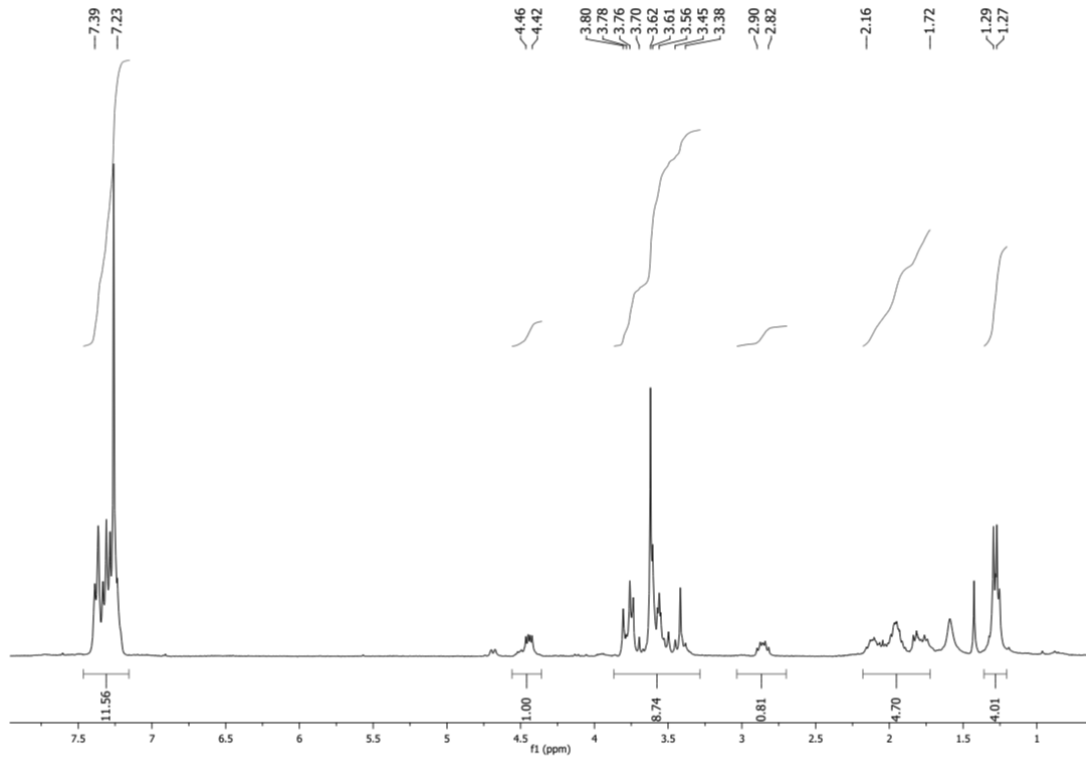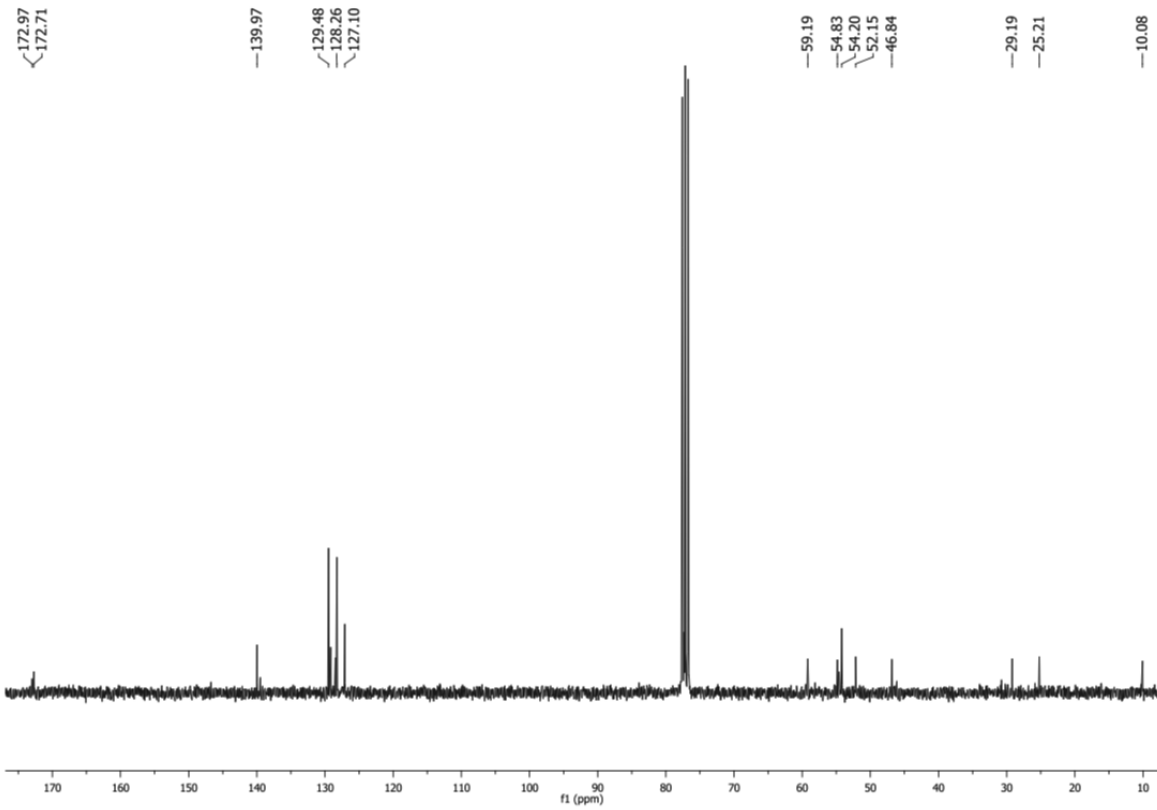

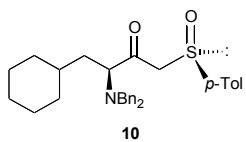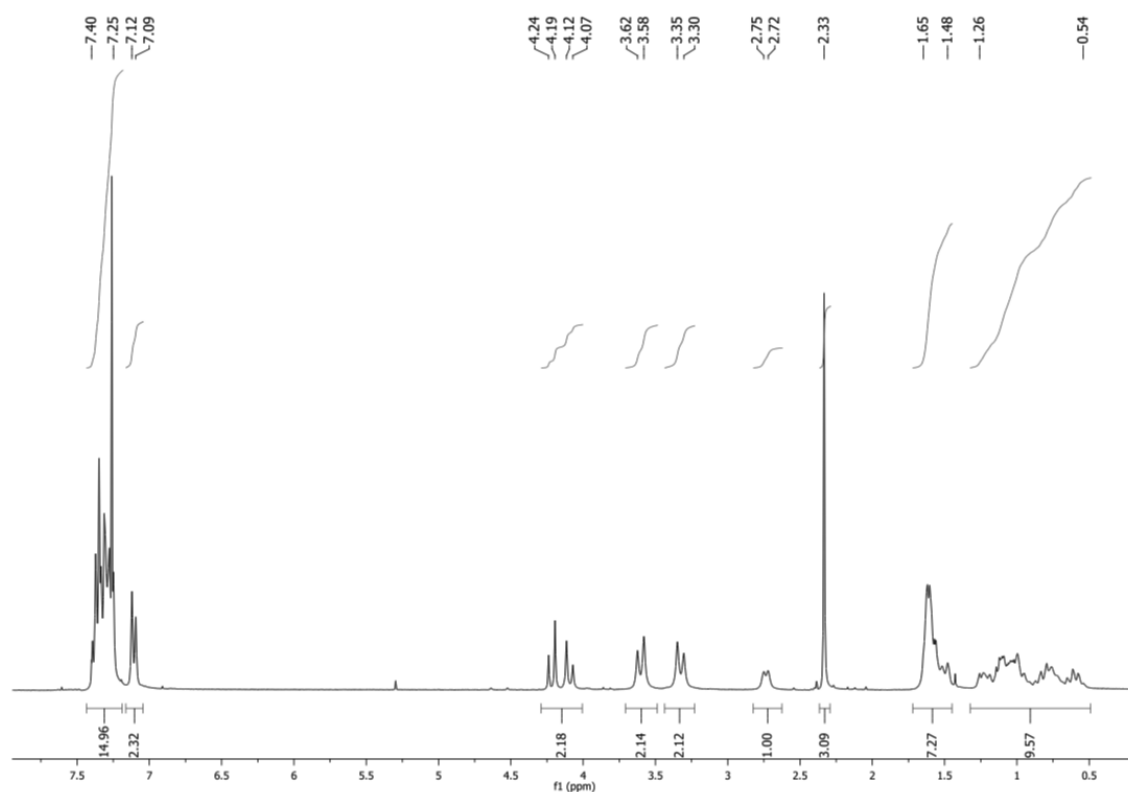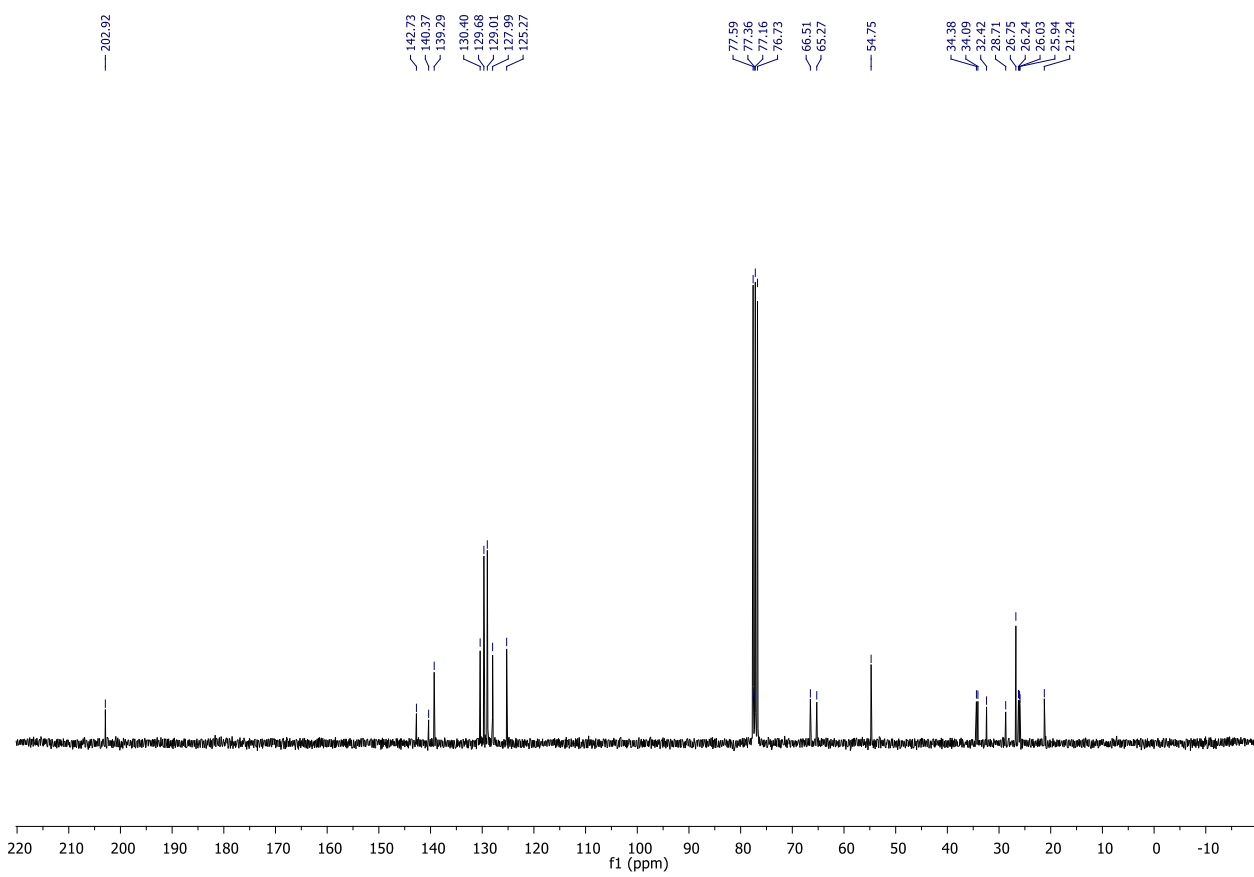

## EcoScale calculation:<sup>9</sup>

For all reactions, the EcoScale evaluation has been done for the production of 10 mmoles of the product starting from the corresponding substrate.

For reactions of dibenzylamine on (*R,S*)-2-bromo-2-phenylacetic acid (*R*)-pantolactone ester (Table 1 of the manuscript):

| <b>Parameters</b>                              | <b>Penalty points</b> |                      |                      |                      |                      |                      |                      |
|------------------------------------------------|-----------------------|----------------------|----------------------|----------------------|----------------------|----------------------|----------------------|
|                                                | Magnetic stirrer      | Magnetic stirrer     | Magnetic stirrer     | Magnetic stirrer     | Ball-mill            | Ball-mill            | Ball-mill            |
| Homogenization technique                       | THF                   | Water                | EtOAc                | DMF                  | Solvent-free         | Water ( $\eta = 1$ ) | Water ( $\eta = 2$ ) |
| Solvent                                        | THF                   | Water                | EtOAc                | DMF                  | Solvent-free         | Water ( $\eta = 1$ ) | Water ( $\eta = 2$ ) |
| Base                                           | Et <sub>3</sub> N     | NaHCO <sub>3</sub>   |
| <b>1. Yield (%)</b>                            | 59                    | 44 <sup>a</sup>      | 73                   | 55                   | 62                   | 94                   | 96                   |
| Penalty points                                 | 20,5                  | 28                   | 13,5                 | 22,5                 | 19                   | 3                    | 2                    |
| <b>2. Reaction components</b>                  |                       |                      |                      |                      |                      |                      |                      |
| Compound <b>1</b> (not commercially available) | 3                     | 3                    | 3                    | 3                    | 3                    | 3                    | 3                    |
| Bn <sub>2</sub> NH (96,60USD for 500g)         | 0                     | 0                    | 0                    | 0                    | 0                    | 0                    | 0                    |
| TBAI (230USD for 500g)                         | 0                     | 0                    | 0                    | 0                    | 0                    | 0                    | 0                    |
| Et <sub>3</sub> N (94,30USD for 1L)            | 0                     | -                    | -                    | -                    | -                    | -                    | -                    |
| NaHCO <sub>3</sub> (64,10USD for 1kg)          | -                     | 0                    | 0                    | 0                    | 0                    | 0                    | 0                    |
| <b>3. Safety</b>                               |                       |                      |                      |                      |                      |                      |                      |
| Compound <b>1</b>                              | 0                     | 0                    | 0                    | 0                    | 0                    | 0                    | 0                    |
| Bn <sub>2</sub> NH                             | 0                     | 0                    | 0                    | 0                    | 0                    | 0                    | 0                    |
| TBAI                                           | 0                     | 0                    | 0                    | 0                    | 0                    | 0                    | 0                    |
| NaHCO <sub>3</sub>                             | -                     | 0                    | 0                    | 0                    | 0                    | 0                    | 0                    |
| Et <sub>3</sub> N: T, F                        | 10                    | -                    | -                    | -                    | -                    | -                    | -                    |
| THF: T, F                                      | 10                    | -                    | -                    | -                    | -                    | -                    | -                    |
| Water                                          | -                     | 0                    | -                    | -                    | -                    | 0                    | 0                    |
| EtOAc : F                                      | -                     | -                    | 5                    | -                    | -                    | -                    | -                    |
| DMF : T, F                                     | -                     | -                    | -                    | 10                   | -                    | -                    | -                    |
| <b>4. Technical setup</b>                      |                       |                      |                      |                      |                      |                      |                      |
| Magnetic stirrer                               | 0                     | 0                    | 0                    | 0                    | -                    | -                    | -                    |
| Ball-mill                                      | -                     | -                    | -                    | -                    | 2                    | 2                    | 2                    |
| <b>5. Temperature/ Time</b>                    |                       |                      |                      |                      |                      |                      |                      |
| Room temperature                               | 1                     | 2                    | 3                    | 1                    | 0                    | 0                    | 0                    |
| <b>6. Workup and purification</b>              |                       |                      |                      |                      |                      |                      |                      |
| Adding solvent                                 | 0                     | 0                    | 0                    | 0                    | 0                    | 0                    | 0                    |
| Liquid-Liquid extraction                       | 3                     | 3                    | 3                    | 3                    | 3                    | 3                    | 3                    |
| Classical chromatography                       | 10                    | 10                   | 10                   | 10                   | 10                   | 10                   | 10                   |
| <b>Total</b>                                   | 57,5                  | 46                   | 37,5                 | 49,5                 | 37                   | 21                   | 20                   |
| <b>Ecoscale score</b>                          | <b>42,5</b>           | <b>54</b>            | <b>62,5</b>          | <b>50,5</b>          | <b>63</b>            | <b>79</b>            | <b>80</b>            |
| <b>Ranking of reaction</b>                     | Inadequate synthesis  | Acceptable Synthesis | Acceptable Synthesis | Acceptable Synthesis | Acceptable Synthesis | Excellent Synthesis  | Excellent Synthesis  |

<sup>a</sup> yield of pure diastereoisomer based on 50% yield based on recovered material and a diastereomeric ratio of 87:13

For reaction of (S)-(-)- $\alpha$ -methylbenzylamine on (R,S)-2-bromo-2-phenylacetic acid (R)-pantolactone ester:

| <b>Parameters</b>                                      |            |          |                                |                                       | <b>Penalty points</b> |                      |
|--------------------------------------------------------|------------|----------|--------------------------------|---------------------------------------|-----------------------|----------------------|
| Homogenization technique                               |            |          |                                |                                       | Magnetic stirrer      | Ball-mill            |
| Solvent                                                |            |          |                                |                                       | THF                   | Water                |
| Base                                                   |            |          |                                |                                       | Et <sub>3</sub> N     | NaHCO <sub>3</sub>   |
| <b>1. Yield (%)<sup>a</sup></b>                        |            |          |                                |                                       | 84,0                  | 80,0                 |
| Penalty points                                         |            |          |                                |                                       | 8,0                   | 10,0                 |
| <b>2. Reaction components</b>                          | <b>Eq.</b> | <b>M</b> | <b>Price/g (Sigma-Aldrich)</b> | <b>Price to get 10mmol of product</b> |                       |                      |
| Compound 1 (not commercially available)                | 1,00       | -        | -                              | -                                     | 3                     | 3                    |
| (S)-(-)- $\alpha$ -Methylbenzylamine (146USD for 100g) | 1,05       | 121,18   | 1,46                           | 2,21                                  | 0                     | -                    |
| (S)-(-)- $\alpha$ -Methylbenzylamine (146USD for 100g) | 1,20       | 121,18   | 1,46                           | 2,65                                  | -                     | 0                    |
| THAI (96,60USD for 10g)                                | 0,20       | 481,58   | 9,66                           | 11,08                                 | 3                     | -                    |
| TBAI (230USD for 500g)                                 | 0,20       | 369,37   | 0,46                           | 0,42                                  | -                     | 0                    |
| Et <sub>3</sub> N (94,30USD for 1L)                    | 2,00       | 101,19   | 0,13                           | 0,31                                  | 0                     | -                    |
| NaHCO <sub>3</sub> (64,10USD for 1kg)                  | 1,20       | 84,01    | 0,06                           | 0,08                                  | -                     | 0                    |
| <b>3. Safety</b>                                       |            |          |                                |                                       |                       |                      |
| Compound 1                                             |            |          |                                |                                       | 0                     | 0                    |
| (S)-(-)- $\alpha$ -Methylbenzylamine                   |            |          |                                |                                       | 0                     | 0                    |
| THAI                                                   |            |          |                                |                                       | 0                     | -                    |
| TBAI                                                   |            |          |                                |                                       | -                     | 0                    |
| Et <sub>3</sub> N: T, F                                |            |          |                                |                                       | 10                    | -                    |
| NaHCO <sub>3</sub>                                     |            |          |                                |                                       | -                     | 0                    |
| THF: T, F                                              |            |          |                                |                                       | 10                    | -                    |
| Water                                                  |            |          |                                |                                       | -                     | 0                    |
| <b>4. Technical setup</b>                              |            |          |                                |                                       |                       |                      |
| Magnetic stirrer                                       |            |          |                                |                                       | 0                     | -                    |
| Ball-mill                                              |            |          |                                |                                       | -                     | 2                    |
| <b>5. Temperature/ Time</b>                            |            |          |                                |                                       |                       |                      |
| Room temperature                                       |            |          |                                |                                       | 1                     | 0                    |
| <b>6. Workup and purification</b>                      |            |          |                                |                                       |                       |                      |
| Adding solvent                                         |            |          |                                |                                       | 0                     | 0                    |
| Liquid-Liquid extraction                               |            |          |                                |                                       | 3                     | 3                    |
| Classical chromatography                               |            |          |                                |                                       | 10                    | 10                   |
| <b>Total</b>                                           |            |          |                                |                                       | 48,0                  | 28,0                 |
| <b>Ecoscale score</b>                                  |            |          |                                |                                       | <b>52,0</b>           | <b>72,0</b>          |
| <b>Ranking of reaction</b>                             |            |          |                                |                                       | Acceptable Synthesis  | Acceptable Synthesis |

<sup>a</sup> Calculated yield of pure major diastereoisomer

For reaction of *p*-anisidine on (*R,S*)-2-bromo-2-phenylacetic acid (*R*)-pantolactone ester:

| <b>Parameters</b>                       |            |          |                                |                                       | <b>Penalty points</b> |                      |
|-----------------------------------------|------------|----------|--------------------------------|---------------------------------------|-----------------------|----------------------|
| Homogenization technique                |            |          |                                |                                       | Magnetic stirrer      | Ball-mill            |
| Solvent                                 |            |          |                                |                                       | THF                   | Water                |
| Base                                    |            |          |                                |                                       | Et <sub>3</sub> N     | NaHCO <sub>3</sub>   |
| <b>1. Yield (%)<sup>a</sup></b>         |            |          |                                |                                       | 75,0                  | 56,0                 |
| Penalty points                          |            |          |                                |                                       | 12,5                  | 22,0                 |
| <b>2. Reaction components</b>           | <b>Eq.</b> | <b>M</b> | <b>Price/g (Sigma-Aldrich)</b> | <b>Price to get 10mmol of product</b> |                       |                      |
| Compound 1 (not commercially available) | 1,00       | -        | -                              | -                                     | 3                     | 3                    |
| <i>p</i> -Anisidine (119USD for 1kg)    | 1,05       | 123,15   | 0,12                           | 0,21                                  | 0                     | -                    |
| <i>p</i> -Anisidine (119USD for 1kg)    | 1,20       | 123,15   | 0,12                           | 0,31                                  | -                     | 0                    |
| THAI (96,60USD for 10g)                 | 0,20       | 481,58   | 9,66                           | 12,41                                 | 3                     | -                    |
| TBAI (230USD for 500g)                  | 0,20       | 369,37   | 0,46                           | 0,61                                  | -                     | 0                    |
| Et <sub>3</sub> N (94,30USD for 1L)     | 2,00       | 101,19   | 0,13                           | 0,35                                  | 0                     | -                    |
| NaHCO <sub>3</sub> (64,10USD for 1kg)   | 1,20       | 84,01    | 0,06                           | 0,12                                  | -                     | 0                    |
| <b>3. Safety</b>                        |            |          |                                |                                       |                       |                      |
| Compound 1                              |            |          |                                |                                       | 0                     | 0                    |
| <i>p</i> -Anisidine : T                 |            |          |                                |                                       | 5                     | 5                    |
| THAI                                    |            |          |                                |                                       | 0                     | -                    |
| TBAI                                    |            |          |                                |                                       | -                     | 0                    |
| Et <sub>3</sub> N: T, F                 |            |          |                                |                                       | 10                    | -                    |
| NaHCO <sub>3</sub>                      |            |          |                                |                                       | -                     | 0                    |
| THF: T, F                               |            |          |                                |                                       | 10                    | -                    |
| Water                                   |            |          |                                |                                       | -                     | 0                    |
| <b>4. Technical setup</b>               |            |          |                                |                                       |                       |                      |
| Magnetic stirrer                        |            |          |                                |                                       | 0                     | -                    |
| Ball-mill                               |            |          |                                |                                       | -                     | 2                    |
| <b>5. Temperature/ Time</b>             |            |          |                                |                                       |                       |                      |
| Room temperature                        |            |          |                                |                                       | 3                     | 1                    |
| <b>6. Workup and purification</b>       |            |          |                                |                                       |                       |                      |
| Adding solvent                          |            |          |                                |                                       | 0                     | 0                    |
| Liquid-Liquid extraction                |            |          |                                |                                       | 3                     | 3                    |
| Classical chromatography                |            |          |                                |                                       | 10                    | 10                   |
| <b>Total</b>                            |            |          |                                |                                       | 59,5                  | 46,0                 |
| <b>Ecoscale score</b>                   |            |          |                                |                                       | <b>40,5</b>           | <b>54,0</b>          |
| <b>Ranking of reaction</b>              |            |          |                                |                                       | Inadequate synthesis  | Acceptable Synthesis |

<sup>a</sup> Calculated yield of pure major diastereoisomer



For reaction of *p*-methoxyphenol on (*R,S*)-2-bromo-2-phenylacetic acid (*R*)-pantolactone ester:

| <b>Parameters</b>                       |  |            |          |                                | <b>Penalty points</b>                 |                      |
|-----------------------------------------|--|------------|----------|--------------------------------|---------------------------------------|----------------------|
| Homogenization technique                |  |            |          |                                | Magnetic stirrer                      | Ball-mill            |
| Solvent                                 |  |            |          |                                | THF                                   | Water                |
| Base                                    |  |            |          |                                | NaH                                   | NaHCO <sub>3</sub>   |
| <b>1. Yield (%)<sup>a</sup></b>         |  |            |          |                                | 70,0                                  | 62,0                 |
| Penalty points                          |  |            |          |                                | 15,0                                  | 19,0                 |
| <b>2. Reaction components</b>           |  | <b>Eq.</b> | <b>M</b> | <b>Price/g (Sigma-Aldrich)</b> | <b>Price to get 10mmol of product</b> |                      |
| Compound 1 (not commercially available) |  | 1,00       | -        | -                              | -                                     | -                    |
| <i>p</i> -MeOPhenol (88.40USD for 1kg)  |  | 1,20       | 124,14   | 0,09                           | 0,19                                  | -                    |
| <i>p</i> -MeOPhenol (88.40USD for 1kg)  |  | 1,20       | 124,14   | 0,09                           | 0,21                                  | 0                    |
| THAI (96,60USD for 10g)                 |  | 0,20       | 481,58   | 9,66                           | 13,29                                 | -                    |
| TBAI (230USD for 500g)                  |  | 0,20       | 369,37   | 0,46                           | 0,55                                  | 0                    |
| NaH (2075USD for 1kg)                   |  | 1,10       | 24,00    | 2,08                           | 0,78                                  | -                    |
| NaHCO <sub>3</sub> (64,10USD for 1kg)   |  | 1,20       | 84,01    | 0,06                           | 0,10                                  | 0                    |
| <b>3. Safety</b>                        |  |            |          |                                |                                       |                      |
| Compound 1                              |  |            |          |                                | 0                                     | 0                    |
| <i>p</i> -MeOPhenol                     |  |            |          |                                | 0                                     | 0                    |
| THAI                                    |  |            |          |                                | 0                                     | -                    |
| TBAI                                    |  |            |          |                                | -                                     | 0                    |
| NaH: Corrosive, F                       |  |            |          |                                | 10                                    | -                    |
| NaHCO <sub>3</sub>                      |  |            |          |                                | -                                     | 0                    |
| THF: T, F                               |  |            |          |                                | 10                                    | -                    |
| Water                                   |  |            |          |                                | -                                     | 0                    |
| <b>4. Technical setup</b>               |  |            |          |                                |                                       |                      |
| Magnetic stirrer                        |  |            |          |                                | 0                                     | -                    |
| Ball-mill                               |  |            |          |                                | -                                     | 2                    |
| <b>5. Temperature/ Time</b>             |  |            |          |                                |                                       |                      |
| Cooling, <0°C                           |  |            |          |                                | 5                                     | -                    |
| Room temperature                        |  |            |          |                                | -                                     | 1                    |
| <b>6. Workup and purification</b>       |  |            |          |                                |                                       |                      |
| Adding solvent                          |  |            |          |                                | 0                                     | 0                    |
| Liquid-Liquid extraction                |  |            |          |                                | 3                                     | 3                    |
| Classical chromatography                |  |            |          |                                | 10                                    | 10                   |
| <b>Total</b>                            |  |            |          |                                | 59                                    | 38,0                 |
| <b>Ecoscale score</b>                   |  |            |          |                                | <b>41</b>                             | <b>62</b>            |
| <b>Ranking of reaction</b>              |  |            |          |                                | Inadequate synthesis                  | Acceptable Synthesis |

<sup>a</sup> Calculated yield of pure major diastereoisomer

For reaction of 2,6-dichlorophenol on (*R,S*)-2-bromo-2-phenylacetic acid (*R*)-pantolactone ester:

| <b>Parameters</b>                             |            |          |                                |                                       | <b>Penalty points</b> |                      |
|-----------------------------------------------|------------|----------|--------------------------------|---------------------------------------|-----------------------|----------------------|
| Homogenization technique                      |            |          |                                |                                       | Magnetic stirrer      | Ball-mill            |
| Solvent                                       |            |          |                                |                                       | THF                   | Water                |
| Base                                          |            |          |                                |                                       | NaH                   | NaHCO <sub>3</sub>   |
| <b>1. Yield (%)<sup>a</sup></b>               |            |          |                                |                                       | 39,0                  | 43,0                 |
| Penalty points                                |            |          |                                |                                       | 30,5                  | 28,5                 |
| <b>2. Reaction components</b>                 |            |          |                                |                                       |                       |                      |
|                                               | <b>Eq.</b> | <b>M</b> | <b>Price/g (Sigma-Aldrich)</b> | <b>Price to get 10mmol of product</b> |                       |                      |
| Compound 1 (not commercially available)       | 1,00       | -        | -                              | -                                     | 3                     | 3                    |
| 2,6-Dichlorophenol (73.80USD for 100g)        | 1,30       | 163,00   | 0,74                           | 4,01                                  | 0                     | -                    |
| 2,6-Dichlorophenol (73.80USD for 100g)        | 1,20       | 163,00   | 0,74                           | 3,36                                  | -                     | 0                    |
| TPAI (165,00USD for 100g)                     | 0,20       | 425,49   | 1,65                           | 3,60                                  | 0                     | -                    |
| TBAI (230USD for 500g)                        | 0,20       | 369,37   | 0,46                           | 0,79                                  | -                     | 0                    |
| NaH (2075USD for 1kg)                         | 1,10       | 24,00    | 2,08                           | 1,40                                  | 0                     | -                    |
| NaHCO <sub>3</sub> (64,10USD for 1kg)         | 1,20       | 84,01    | 0,06                           | 0,15                                  | -                     | 0                    |
| <b>3. Safety</b>                              |            |          |                                |                                       |                       |                      |
| Compound 1                                    |            |          |                                |                                       | 0                     | 0                    |
| 2,6-Dichlorophenol: Dangerous for environment |            |          |                                |                                       | 5                     | 5                    |
| TPAI                                          |            |          |                                |                                       | 0                     | -                    |
| TBAI                                          |            |          |                                |                                       | -                     | 0                    |
| NaH: Corrosive, F                             |            |          |                                |                                       | 10                    | -                    |
| NaHCO <sub>3</sub>                            |            |          |                                |                                       | -                     | 0                    |
| THF: T, F                                     |            |          |                                |                                       | 10                    | -                    |
| Water                                         |            |          |                                |                                       | -                     | 0                    |
| <b>4. Technical setup</b>                     |            |          |                                |                                       |                       |                      |
| Magnetic stirrer                              |            |          |                                |                                       | 0                     | -                    |
| Ball-mill                                     |            |          |                                |                                       | -                     | 2                    |
| <b>5. Temperature/ Time</b>                   |            |          |                                |                                       |                       |                      |
| Cooling, <0°C                                 |            |          |                                |                                       | 5                     | -                    |
| Room temperature                              |            |          |                                |                                       | -                     | 1                    |
| <b>6. Workup and purification</b>             |            |          |                                |                                       |                       |                      |
| Adding solvent                                |            |          |                                |                                       | 0                     | 0                    |
| Liquid-Liquid extraction                      |            |          |                                |                                       | 3                     | 3                    |
| Classical chromatography                      |            |          |                                |                                       | 10                    | 10                   |
| <b>Total</b>                                  |            |          |                                |                                       | 76,5                  | 52,5                 |
| <b>Ecoscale score</b>                         |            |          |                                |                                       | <b>23,5</b>           | <b>47,5</b>          |
| <b>Ranking of reaction</b>                    |            |          |                                |                                       | Inadequate synthesis  | Inadequate synthesis |

<sup>a</sup> Calculated yield of pure major diastereoisomer

For reaction of dibenzylamine on 1-(2-bromo-1-oxopropyl)-L-proline methyl ester:

| <b>Parameters</b>                              |  |            |          |                                | <b>Penalty points</b>                 |                      |
|------------------------------------------------|--|------------|----------|--------------------------------|---------------------------------------|----------------------|
| Homogenization technique                       |  |            |          |                                | Magnetic stirrer                      | Ball-mill            |
| Solvent                                        |  |            |          |                                | DCM                                   | Water                |
| Base                                           |  |            |          |                                | Et <sub>3</sub> N                     | NaHCO <sub>3</sub>   |
| <b>1. Yield (%)</b>                            |  |            |          |                                | 70,0                                  | 75,0                 |
| Penalty points                                 |  |            |          |                                | 15,0                                  | 12,5                 |
| <b>2. Reaction components</b>                  |  | <b>Eq.</b> | <b>M</b> | <b>Price/g (Sigma-Aldrich)</b> | <b>Price to get 10mmol of product</b> |                      |
| Compound <b>7</b> (not commercially available) |  | 1,00       | -        | -                              | -                                     | 3                    |
| Bn <sub>2</sub> NH (96,60USD for 500g)         |  | 1,05       | 197,28   | 0,19                           | 0,57                                  | 0                    |
| Bn <sub>2</sub> NH (96,60USD for 500g)         |  | 2,16       | 197,28   | 0,19                           | 1,10                                  | -                    |
| TBAI (230USD for 500g)                         |  | 1,00       | 369,37   | 0,46                           | 2,43                                  | 0                    |
| TBAI (230USD for 500g)                         |  | 0,20       | 369,37   | 0,46                           | 0,45                                  | -                    |
| Et <sub>3</sub> N (94,30USD for 1L)            |  | 1,00       | 101,19   | 0,13                           | 0,19                                  | 0                    |
| NaHCO <sub>3</sub> (64,10USD for 1kg)          |  | 1,20       | 84,01    | 0,06                           | 0,09                                  | -                    |
| <b>3. Safety</b>                               |  |            |          |                                |                                       |                      |
| Compound <b>7</b>                              |  |            |          |                                | 0                                     | 0                    |
| Bn <sub>2</sub> NH                             |  |            |          |                                | 0                                     | 0                    |
| TBAI                                           |  |            |          |                                | 0                                     | 0                    |
| Et <sub>3</sub> N: T, F                        |  |            |          |                                | 10                                    | -                    |
| NaHCO <sub>3</sub>                             |  |            |          |                                | -                                     | 0                    |
| Water                                          |  |            |          |                                | -                                     | 0                    |
| DCM : T                                        |  |            |          |                                | 5                                     | -                    |
| <b>4. Technical setup</b>                      |  |            |          |                                |                                       |                      |
| Magnetic stirrer                               |  |            |          |                                | 0                                     | -                    |
| Ball-mill                                      |  |            |          |                                | -                                     | 2                    |
| <b>5. Temperature/ Time</b>                    |  |            |          |                                |                                       |                      |
| Room temperature                               |  |            |          |                                | 3                                     | 1                    |
| <b>6. Workup and purification</b>              |  |            |          |                                |                                       |                      |
| Adding solvent                                 |  |            |          |                                | 0                                     | 0                    |
| Liquid-Liquid extraction                       |  |            |          |                                | 3                                     | 3                    |
| Classical chromatography                       |  |            |          |                                | 10                                    | 10                   |
| <b>Total</b>                                   |  |            |          |                                | 49,0                                  | 31,5                 |
| <b>Ecoscale score</b>                          |  |            |          |                                | <b>51,0</b>                           | <b>68,5</b>          |
| <b>Ranking of reaction</b>                     |  |            |          |                                | Acceptable Synthesis                  | Acceptable Synthesis |

For reaction of dibenzylamine on 3-bromo-4-cyclohexyl-1-[(*R*)-*p*-tolylsulfinyl]butan-2-one:

| <b><u>Parameters</u></b>                       |  |                   |                 |                                       | <b><u>Penalty points</u></b>                 |                      |
|------------------------------------------------|--|-------------------|-----------------|---------------------------------------|----------------------------------------------|----------------------|
| Homogenization technique                       |  |                   |                 |                                       | Magnetic stirrer                             | Ball-mill            |
| Solvent                                        |  |                   |                 |                                       | THF                                          | Water                |
| Base                                           |  |                   |                 |                                       | Bn <sub>2</sub> NH                           | Bn <sub>2</sub> NH   |
| <b><u>1. Yield (%)</u></b>                     |  |                   |                 |                                       | 74,0                                         | 71,0                 |
| Penalty points                                 |  |                   |                 |                                       | 13,0                                         | 14,5                 |
| <b><u>2. Reaction components</u></b>           |  | <b><u>Eq.</u></b> | <b><u>M</u></b> | <b><u>Price/g (Sigma-Aldrich)</u></b> | <b><u>Price to get 10mmol of product</u></b> |                      |
| Compound <b>9</b> (not commercially available) |  | 1,00              | -               | -                                     | 3                                            | 3                    |
| Bn <sub>2</sub> NH (96,60USD for 500g)         |  | 2,50              | 197,28          | 0,19                                  | 0                                            | -                    |
| TBAI (230USD for 500g)                         |  | 0,20              | 369,37          | 0,46                                  | -                                            | 0                    |
| <b><u>3. Safety</u></b>                        |  |                   |                 |                                       |                                              |                      |
| Compound <b>9</b>                              |  |                   |                 |                                       | 0                                            | 0                    |
| Bn <sub>2</sub> NH                             |  |                   |                 |                                       | 0                                            | 0                    |
| TBAI                                           |  |                   |                 |                                       | -                                            | 0                    |
| Water                                          |  |                   |                 |                                       | -                                            | 0                    |
| THF : T, F                                     |  |                   |                 |                                       | 10                                           | -                    |
| <b><u>4. Technical setup</u></b>               |  |                   |                 |                                       |                                              |                      |
| Magnetic stirrer                               |  |                   |                 |                                       | 0                                            | -                    |
| Ball-mill                                      |  |                   |                 |                                       | -                                            | 2                    |
| <b><u>5. Temperature/ Time</u></b>             |  |                   |                 |                                       |                                              |                      |
| Room temperature                               |  |                   |                 |                                       | 3                                            | 1                    |
| <b><u>6. Workup and purification</u></b>       |  |                   |                 |                                       |                                              |                      |
| Adding solvent                                 |  |                   |                 |                                       | 0                                            | 0                    |
| Liquid-Liquid extraction                       |  |                   |                 |                                       | 3                                            | 3                    |
| Classical chromatography                       |  |                   |                 |                                       | 10                                           | 10                   |
| <b><u>Total</u></b>                            |  |                   |                 |                                       | 42,0                                         | 33,5                 |
| <b><u>Ecoscale score</u></b>                   |  |                   |                 |                                       | <b>58,0</b>                                  | <b>66,5</b>          |
| <b><u>Ranking of reaction</u></b>              |  |                   |                 |                                       | Acceptable Synthesis                         | Acceptable Synthesis |

## References :

1. T. Friščić, S. L. Childs, S. A. A. Rizvi and W. Jones, *CrystEngComm*, 2009, **11**, 418-426.
2. R. N. Ben and T. Durst, *J. Org. Chem.*, 1999, **64**, 7700-7706.
3. K. Koh and T. Durst, *J. Org. Chem.*, 1994, **59**, 4683-4686.
4. G. Massolini, G. Fracchiolla, E. Calleri, G. Carbonara, C. Temporini, A. Lavecchia, S. Cosconati, E. Novellino and F. Loiodice, *Chirality*, 2006, **18**, 633-643.
5. J. Nam, J.-Y. Chang, K.-S. Hahm and Y. S. Park, *Tetrahedron Lett.*, 2003, **44**, 7727-7730.
6. S. Y. Kang and Y. S. Park, *Eur. J. Org. Chem.*, 2012, 1703-1706.
7. W.-J. Bai, S. K. Jackson and T. R. R. Pettus, *Org. Lett.*, 2012, **14**, 3862-3865.
8. P.-Y. Géant, J. Martinez and X. J. Salom-Roig, *Eur. J. Org. Chem.*, 2011, 1300-1309.
9. K. Van Aken, L. Streckowski and L. Patiny, *Beilstein J. Org. Chem.*, 2006, **2**, 3.
